# Supplementary material
Source: PubMed Central journal article supplement (PMC8455685)
Supplement: mmc1.pdf [file mmc1.pdf]

# Olmsted County, Minnesota COVID-19 Analysis 3/11– 3/31/2020 Rochester Urban Hotspots

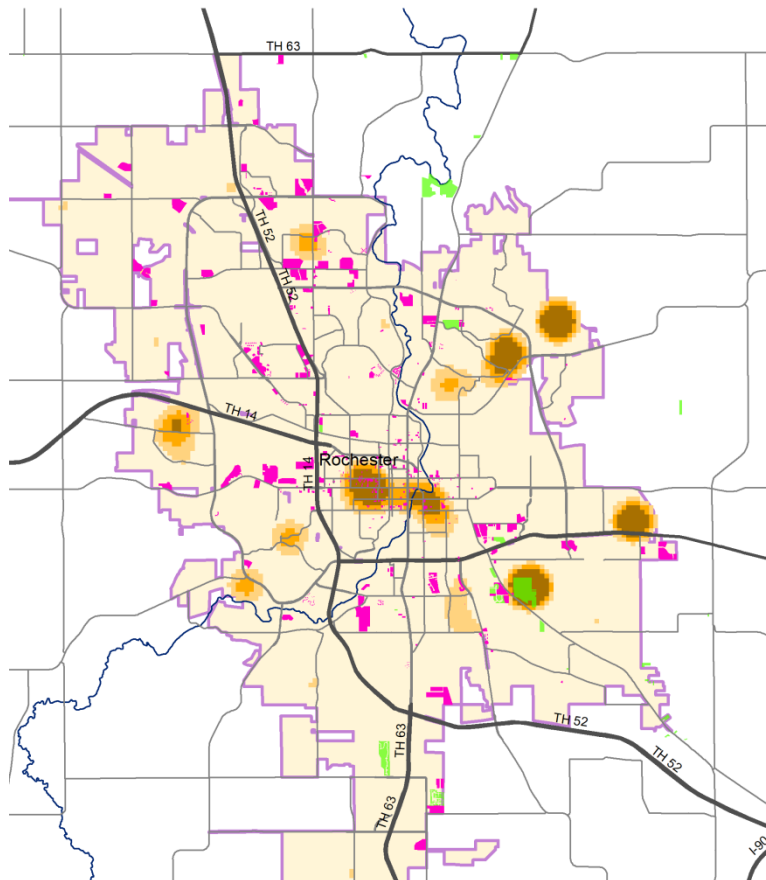

## Legend

■ MHCs

■ APTS

## Temporal Trends

### Weighted Case Density

< 80%ile

80 - 90%ile

90 - 95%ile

95%ile +

# Olmsted County, Minnesota COVID-19 Analysis 4/01– 4/15/2020 Rochester Urban Hotspots

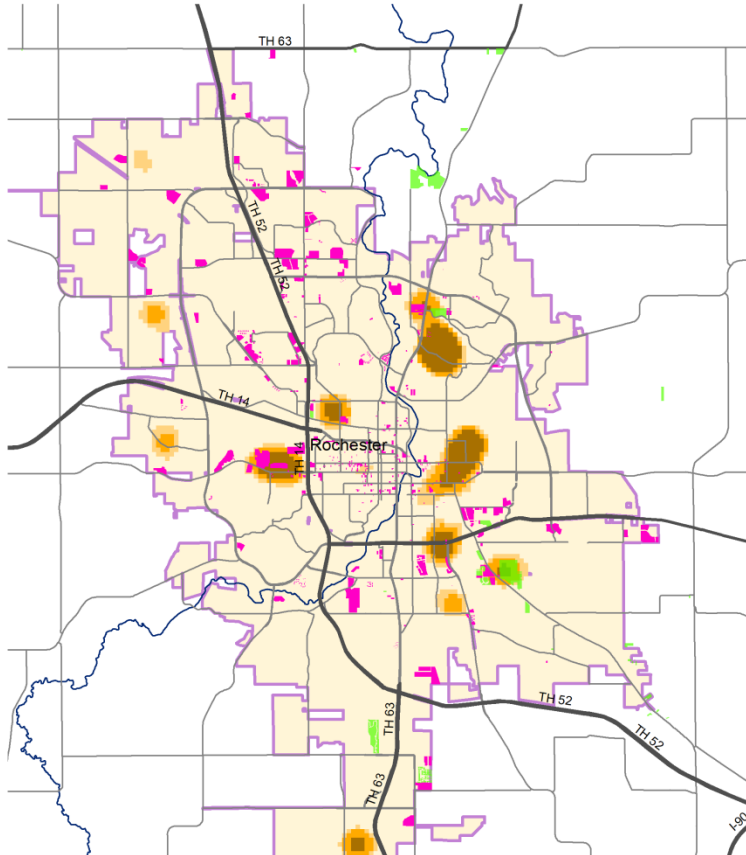

## Legend

- MHCs
- APTS

## Temporal Trends

### Weighted Case Density

- < 80%ile
- 80 - 90%ile
- 90 - 95%ile
- 95%ile +

Olmsted County, Minnesota  
COVID-19 Analysis  
4/16– 4/30/2020 Rochester  
Urban Hotspots

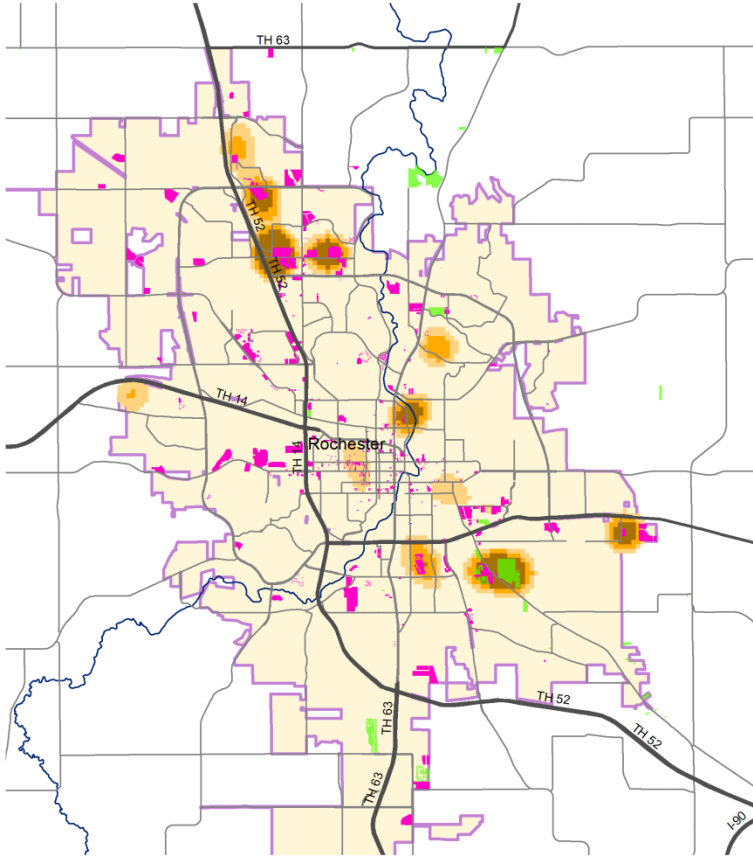

**Legend**

- MHCs
- APTS

**Temporal Trends**

**Weighted Case Density**

- < 80%ile
- 80 - 90%ile
- 90 - 95%ile
- 95%ile +

# Olmsted County, Minnesota COVID-19 Analysis 5/1– 5/15/2020 Rochester Urban Hotspots

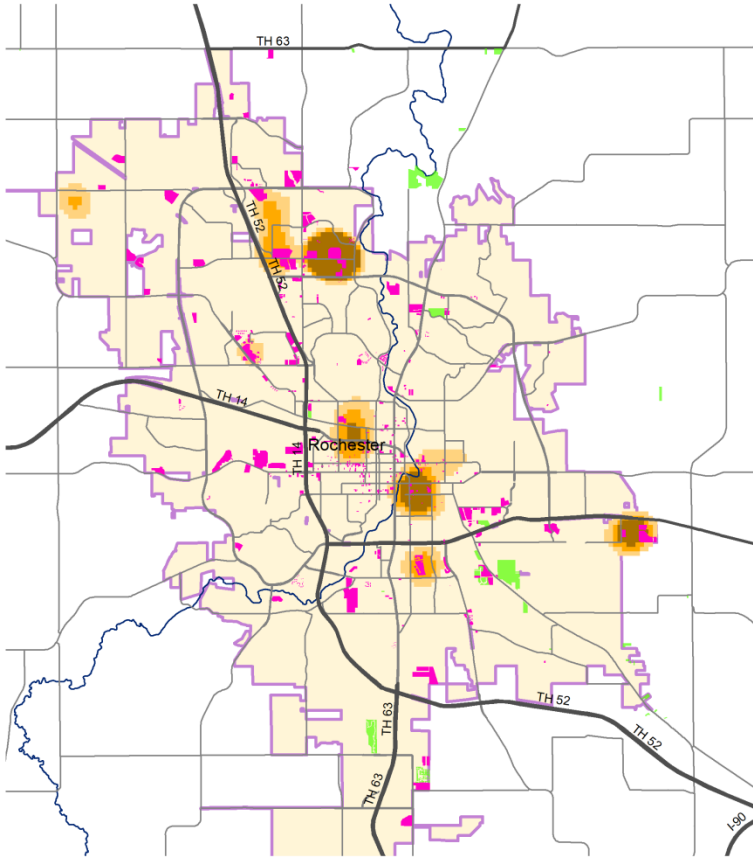

### Legend

- MHCs
- APTS

### Temporal Trends

### Weighted Case Density

- < 80%ile
- 80 - 90%ile
- 90 - 95%ile
- 95%ile +

# Olmsted County, Minnesota COVID-19 Analysis 5/16– 5/31/2020 Rochester Urban Hotspots

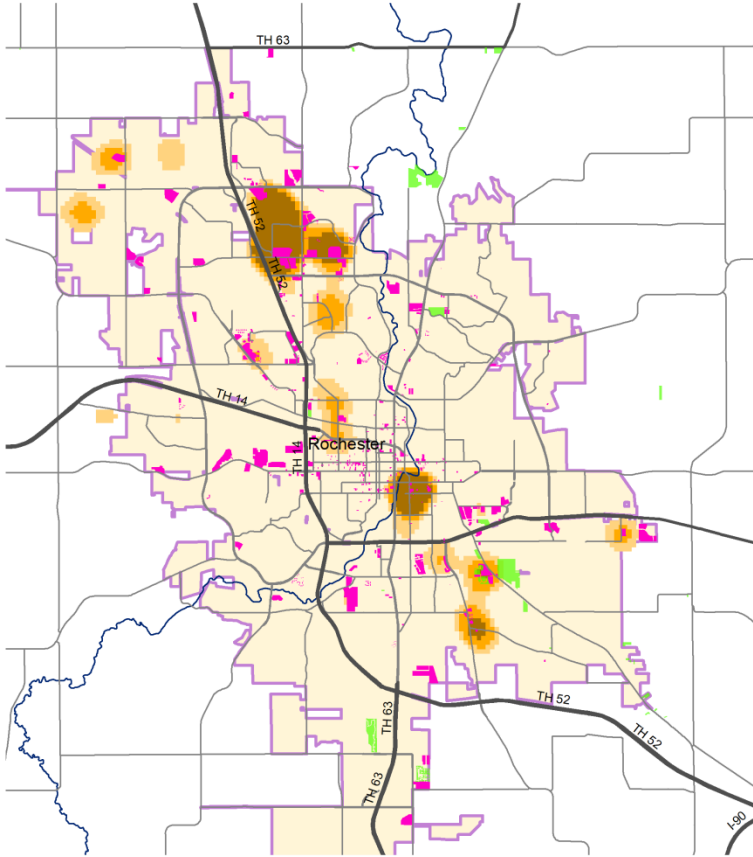

### Legend

- MHCs
- APTS

### Temporal Trends

### Weighted Case Density

- < 80%ile
- 80 - 90%ile
- 90 - 95%ile
- 95%ile +

# Olmsted County, Minnesota COVID-19 Analysis 6/1– 6/15/2020 Rochester Urban Hotspots

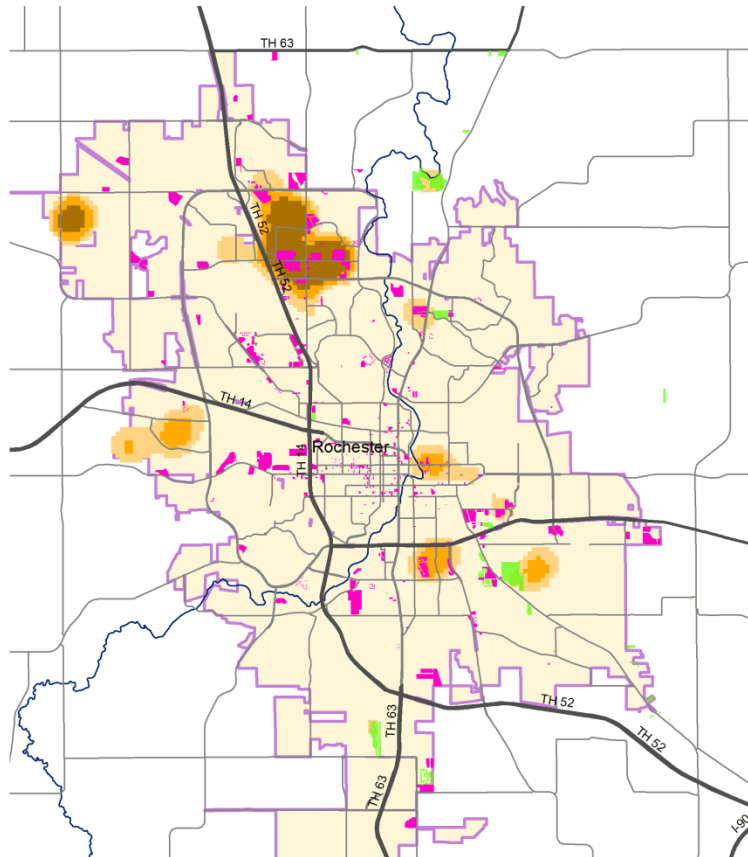

## Legend

- MHCs
- APTS

## Temporal Trends

### Weighted Case Density

- < 80%ile
- 80 - 90%ile
- 90 - 95%ile
- 95%ile +

Olmsted County, Minnesota  
COVID-19 Analysis  
6/16– 6/30/2020 Rochester  
Urban Hotspots

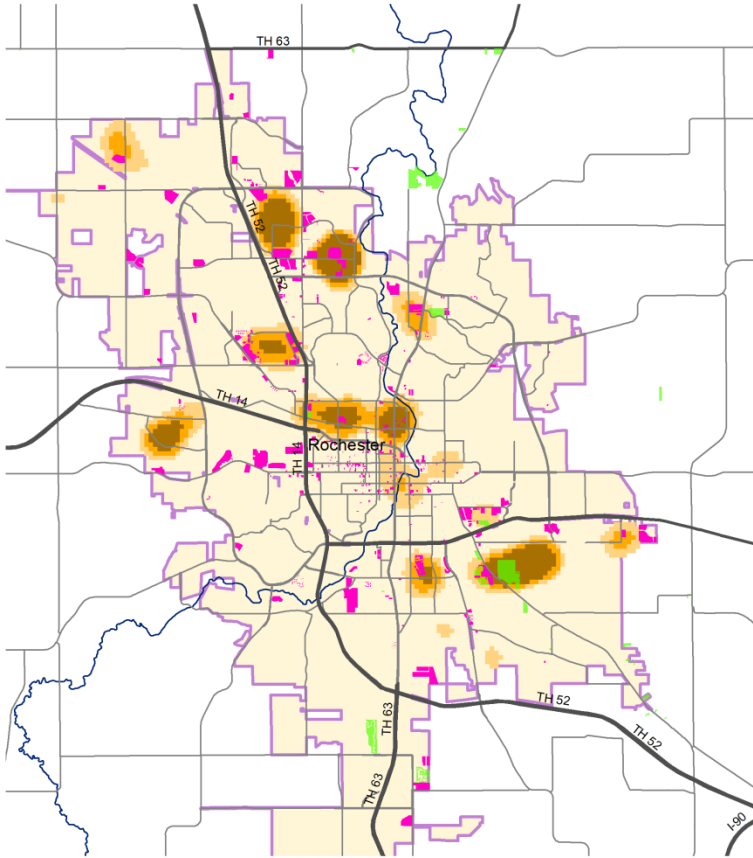

**Legend**

- MHCs
- APTS

**Temporal Trends**

**Weighted Case Density**

- < 80%ile
- 80 - 90%ile
- 90 - 95%ile
- 95%ile +

# Olmsted County, Minnesota COVID-19 Analysis 7/1– 7/15/2020 Rochester Urban Hotspots

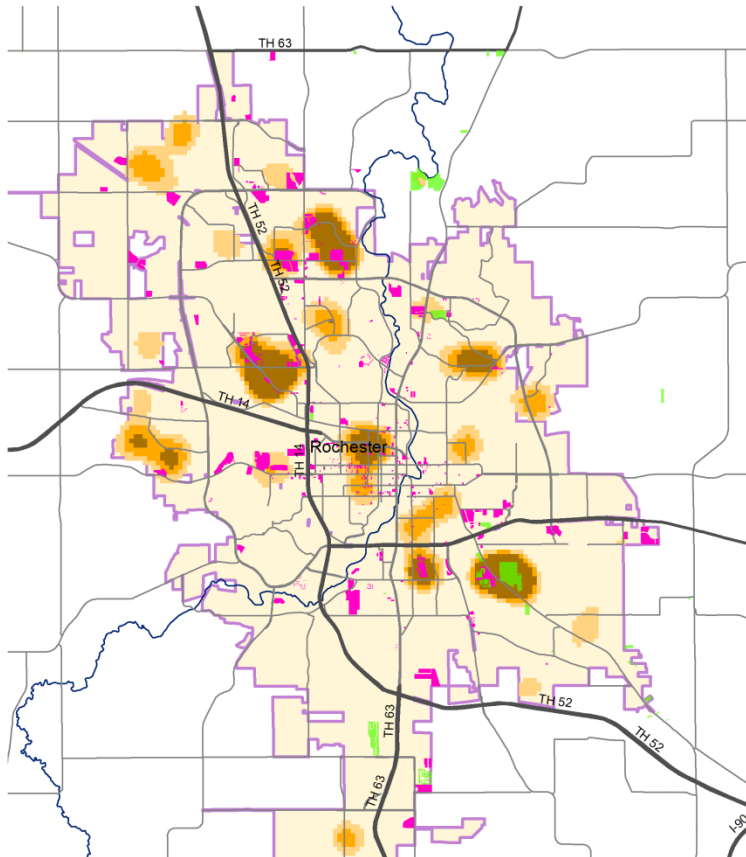

## Legend

- MHCs
- APTS

## Temporal Trends

### Weighted Case Density

- < 80%ile
- 80 - 90%ile
- 90 - 95%ile
- 95%ile +



Olmsted County, Minnesota  
COVID-19 Analysis  
7/16– 7/31/2020 Rochester  
Urban Hotspots

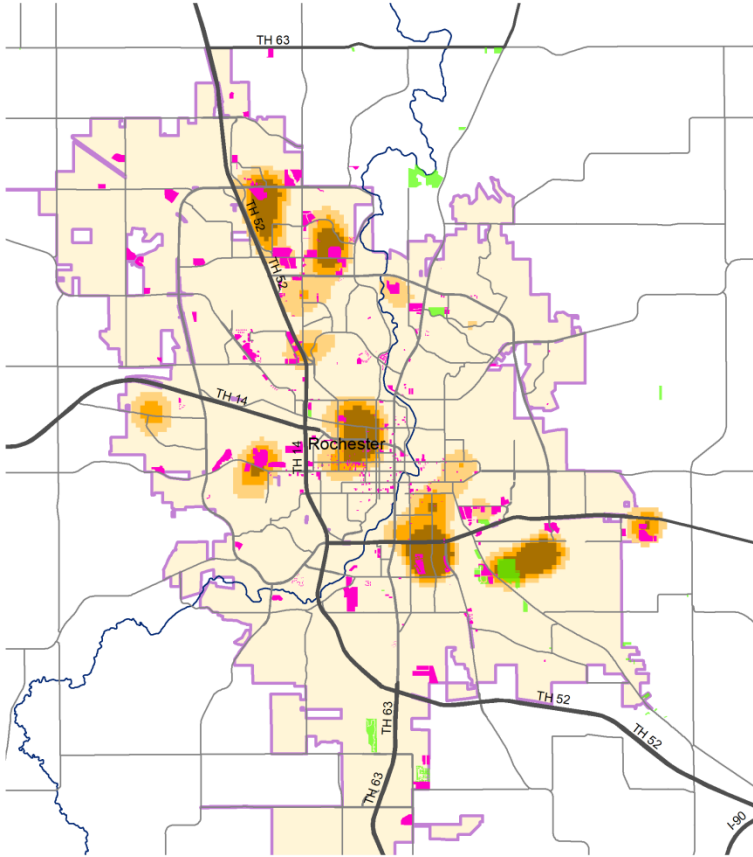

**Legend**

- MHCs
- APTS

**Temporal Trends**

**Weighted Case Density**

- < 80%ile
- 80 - 90%ile
- 90 - 95%ile
- 95%ile +

# Olmsted County, Minnesota COVID-19 Analysis 8/1– 8/15/2020 Rochester Urban Hotspots

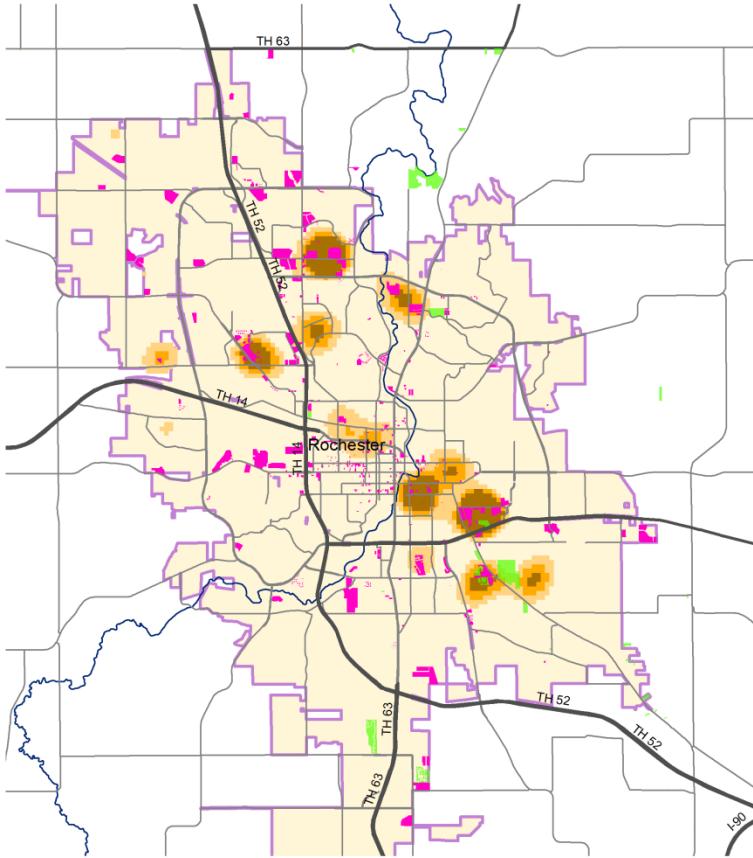

### Legend

- MHCs
- APTS

### Temporal Trends

### Weighted Case Density

- < 80%ile
- 80 - 90%ile
- 90 - 95%ile
- 95%ile +

# Olmsted County, Minnesota COVID-19 Analysis 8/16– 8/31/2020 Rochester Urban Hotspots

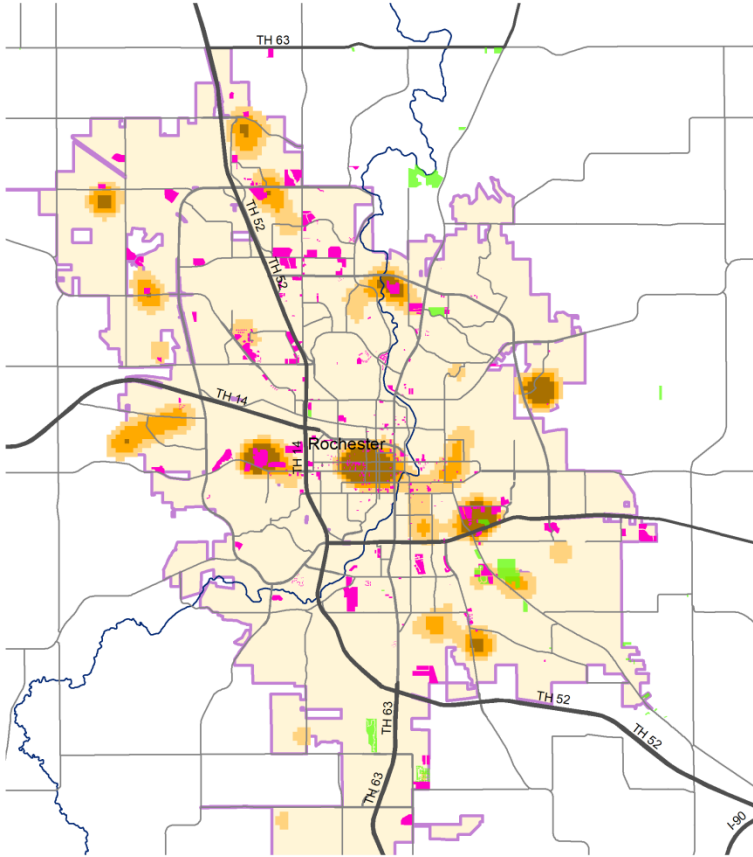

### Legend

- MHCs
- APTS

### Temporal Trends

### Weighted Case Density

- < 80%ile
- 80 - 90%ile
- 90 - 95%ile
- 95%ile +

# Olmsted County, Minnesota COVID-19 Analysis 9/1– 9/15/2020 Rochester Urban Hotspots

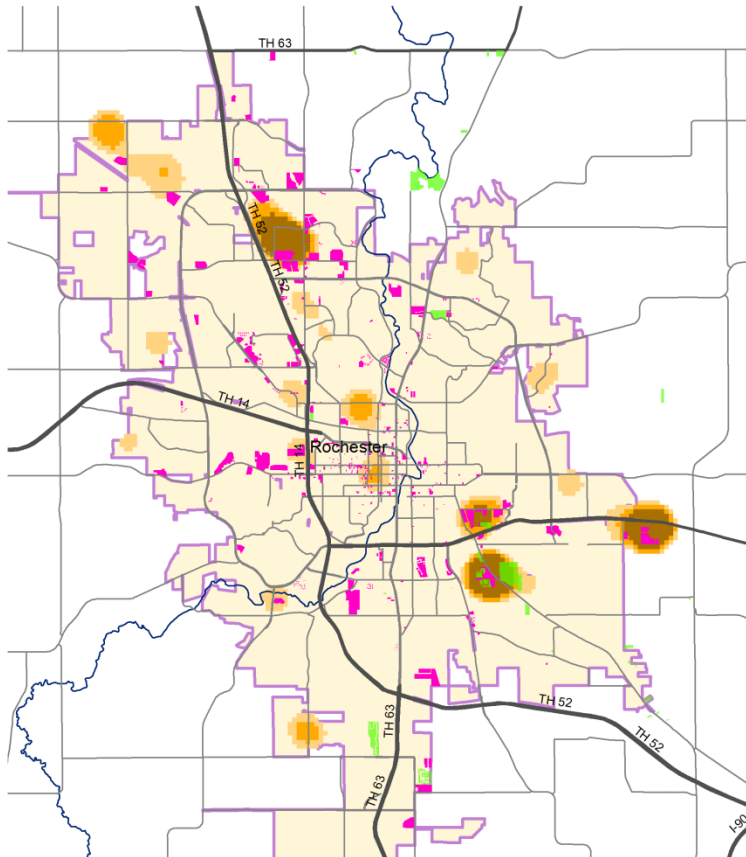

## Legend

- MHCs
- APTS

## Temporal Trends

### Weighted Case Density

- < 80%ile
- 80 - 90%ile
- 90 - 95%ile
- 95%ile +

# Olmsted County, Minnesota COVID-19 Analysis 9/16– 9/30/2020 Rochester Urban Hotspots

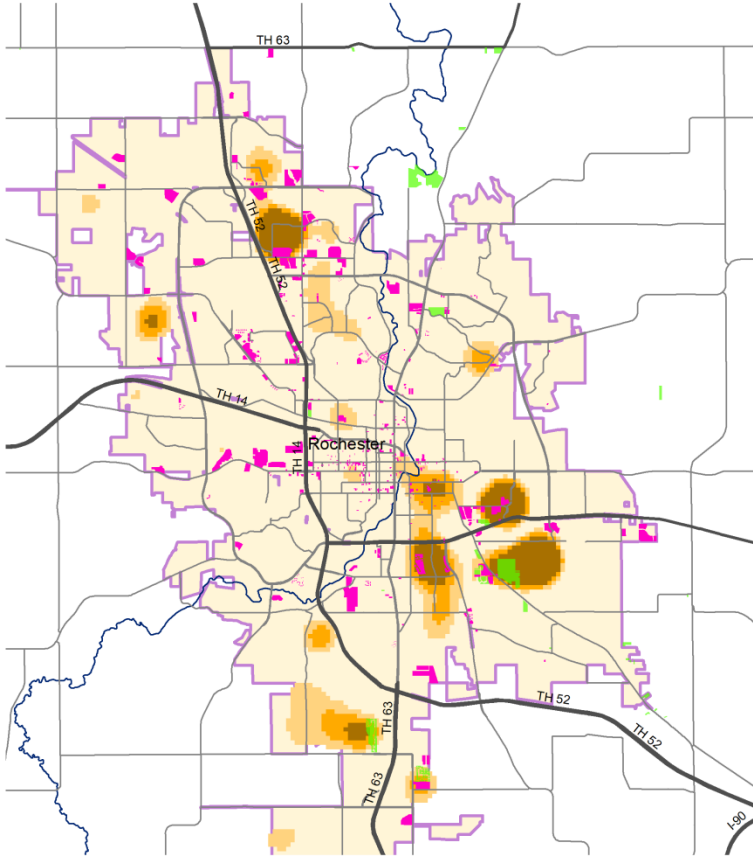

### Legend

- MHCs
- APTS

### Temporal Trends

### Weighted Case Density

- < 80%ile
- 80 - 90%ile
- 90 - 95%ile
- 95%ile +

# Olmsted County, Minnesota COVID-19 Analysis 10/1– 10/15/2020 Rochester Urban Hotspots

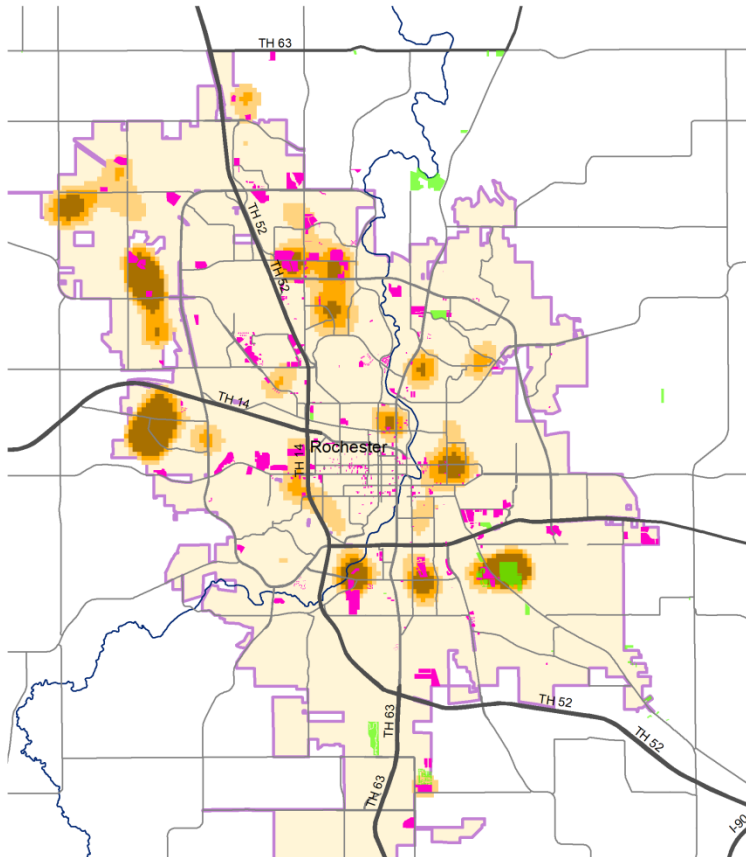

## Legend

- MHCs
- APTS

## Temporal Trends

### Weighted Case Density

- < 80%ile
- 80 - 90%ile
- 90 - 95%ile
- 95%ile +

Olmsted County, Minnesota  
COVID-19 Analysis  
10/16– 10/31/2020  
Rochester Urban Hotspots

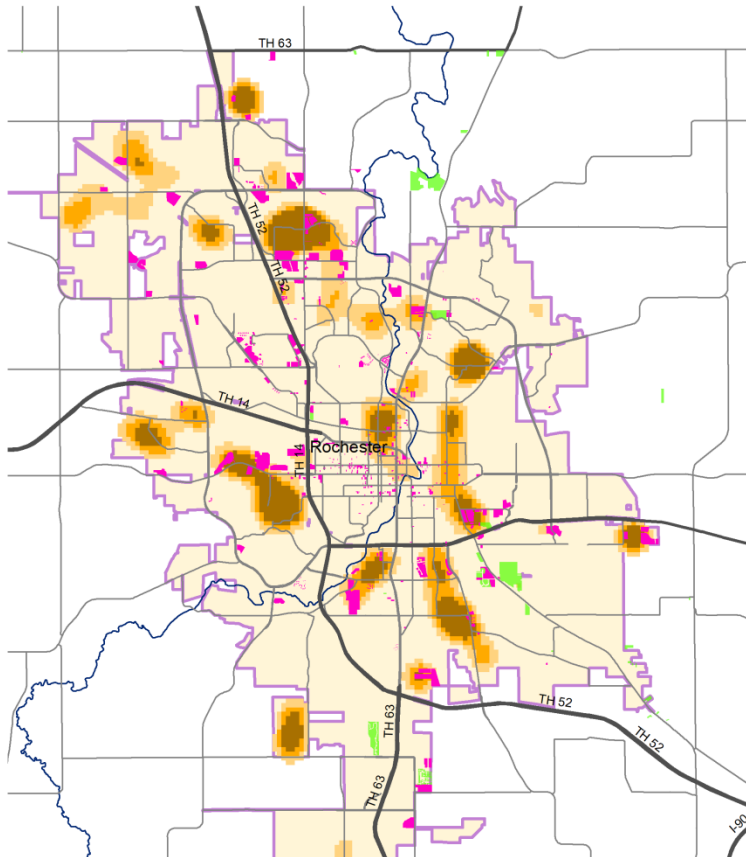

**Legend**

- MHCs
- APTS

**Temporal Trends**

**Weighted Case Density**

- < 80%ile
- 80 - 90%ile
- 90 - 95%ile
- 95%ile +
